# Supplementary material for: Insects of French Guiana: a baseline for diversity and taxonomic effort
Source: Zookeys. 2014 Aug 14;(434):111–30. doi: 10.3897/zookeys.434.7582 (PMC4141168; doi:10.3897/zookeys.434.7582)
Supplement: Supplementary material 2 — Total species richness estimations for 68 taxonomic groups in French Guiana [file zookeys-434-111-s002.xls]

## Sheet: Feuil1
Supplementary file 2. Total species richness estimations for 68 groups. Estimated and extrapolated species richness for 68 taxonomic groups in French Guiana and comparative figures for two well-known faunas. These taxa are used to extrapolate the total number of species in French Guiana. Reference fauna’ figures are based on TAXREF (MNHN, 2013) for France and Nomina insecta Nearctica (Poole and G…
	Extrapolated number of species					Reference faunas
Taxa	Minimal	Maximal	Probable	Extrapolation type	Experts names	France	Nearctic region
Coleoptera, Geotrupidae (includ Bolboceratinae)	11	20	15	Expert opinion	Olivier Boilly	17	71
Coleoptera, Brentidae	90	150	120	Expert opinion	Antoine Mantilleri	1	171
Coleoptera, Buprestidae	500	700	600	Statistical estimator	Stéphane Brûlé	171	728
Coleoptera, Carabidae	500	1500	1000	Expert opinion	Terry Erwin	1037	2345
Coleoptera, Cerambycidae	1800	2200	2000	Statistical estimator	Pierre-Henri Dalens & Julien Touroult	241	981
Coleoptera, Coccinellidae	100	150	120	Statistical estimator	Lucia Massutti de Almeida & Paula Batista Dos Santos	112	423
Coleoptera, Dytiscidae	400	800	600	Expert opinion	Daniel Lohez	197	509
Coleoptera, Erotylidae	215		307	Statistical estimator	Jean-Hervé Yvinec	15	50
Coleoptera, Histeridae	400	2000	600	Expert opinion	Nicolas Degallier	150	425
Coleoptera, Hybosoridae Ceratocanthinae	40	60	50	Expert opinion	Alberto Ballerio	1	3
Coleoptera, Lucanidae	2	3	2	Expert opinion	Pierre-Henri Dalens	11	29
Coleoptera, Melolonthidae	18	50	36	Expert opinion	Miguel Angel Moron Rios	30	1000
Coleoptera, Passalidae	35		40	Expert opinion	Stéphane Boucher	0	3
Coleoptera, Scarabaeidae, Dynastinae	142	155	145	Expert opinion	Yannig Ponchel & Julien Touroult	7	62
Coleoptera, Scarabaeidae, Scarabaeinae	200	300	260	Expert opinion	François Feer, Olivier Boilly	47	150
Dermaptera, All families	49	100	70	Expert opinion	Christophe Girod	15	23
Diptera, Asilidae	300	500		Expert opinion	Guy Tomasovic	171	1010
Diptera, Sarcophagidae	60	120		Expert opinion	Thomas Pape	179	386
Diptera, Syrphidae			500	Expert opinion	Menno Reemer	535	903
Ephemeroptera, All families	100	300	200	Expert opinion	Alain Thomas	144	599
Hemiptera, Aetalionidae	10	30	20	Expert opinion	Albino Sakakibara	0	7
Hemiptera, Aradidae	60	100	75	Expert opinion	Ernst Heiss	30	125
Hemiptera, Cicadellidae	300	5000	2000	Expert opinion	Daniela Takiya	529	3195
Hemiptera, Cicadidae	55	100	80	Statistical estimator	Marc Thouvenot	19	178
Hemiptera, Fulgoridae	100	150	120	Expert opinion	Pierre-Henri Dalens	0	18
Hemiptera, Membracidae	100	300	200	Expert opinion	Albino Sakakibara	3	257
Hemiptera, Pentatomoidea (Pentatomidae, Scutelleridae & Cydnidae)	300	400	330	Expert opinion	Roland Lupoli	151	301
Hemiptera, Reduviidae	250	500	350	Expert opinion	Jean-Michel Bérenger	47	158
Hemiptera, Tingidae	19		26	Expert opinion	Eric Guilbert	77	156
Hymenoptera, Apidae	140	200	170	Expert opinion	Gérard Le Goff	936	49
Hymenoptera, Braconidae	1500	5000	3000	Expert opinion	Yves Braet	815	2250
Hymenoptera, Chalcidoidea	3000	10000	5000	Expert opinion	Gérard Delvare	970	2633
Hymenoptera, Chrysididae	50	200		Expert opinion	Marc Tussac	140	234
Hymenoptera, Formicidae	650	850	700	Expert opinion	Rodrigo M. Feitosa	245	686
Hymenoptera, Mutillidae	200	400	300	Expert opinion	Antoine Foucart	43	452
Hymenoptera, Pompilidae	200	400	300	Expert opinion	Frédéric Durand	156	296
Blattodea, Termitoidea	180	260	220	Expert opinion	Ivan Paulmier	6	44
Lepidoptera, Apatelodidae	80	120	100	Expert opinion	Philippe Collet	0	5
Lepidoptera, Arctiidae	885	1100	950	Expert opinion	Philippe Collet	67	267
Lepidoptera, Castniidae	19	21	20	Expert opinion	Frédéric Bénéluz	1	0
Lepidoptera, Cossidae	80	150	100	Expert opinion	Philippe Collet	7	46
Lepidoptera, Hedylidae	15	20	17	Expert opinion	Philippe Collet	0	0
Lepidoptera, Hesperiidae	650			Expert opinion	Bernard Hermier	31	292
Lepidoptera, Lasiocampidae	150	250	200	Expert opinion	Philippe Collet	29	35
Lepidoptera, Limacodidae	80	120	100	Expert opinion	Philippe Collet	3	49
Lepidoptera, Lycaenidae	250	350	300	Expert opinion	Christophe Faynel	66	147
Lepidoptera, Lymantriidae	40	60	50	Expert opinion	Philippe Collet	20	33
Lepidoptera, Megalopygidae	80	100	90	Expert opinion	Philippe Collet	0	11
Lepidoptera, Mimallonidae	100	120	110	Expert opinion	Philippe Collet	0	4
Lepidoptera, Noctuidae + Erebidae	1300	2000	1700	Expert opinion	Philippe Collet	726	2990
Lepidoptera, Notodontidae	700	1000	800	Expert opinion	Philippe Collet	42	138
Lepidoptera, Nymphalidae	330	400	360	Expert opinion	Philippe Collet	128	170
Lepidoptera, Papilionidae	40	50	45	Expert opinion	Philippe Collet	10	33
Lepidoptera, Pieridae	30	40	35	Expert opinion	Philippe Collet	28	70
Lepidoptera, Riodinidae	475	500	490	Expert opinion	Serge Fernandez	1	27
Lepidoptera, Saturniidae	180	190	185	Expert opinion	Frédéric Bénéluz	5	76
Lepidoptera, Sphingidae	126	130	128	Expert opinion	Frédéric Bénéluz	27	125
Lepidoptera, Thyrididae	40	80	60	Expert opinion	Philippe Collet	1	12
Odonata, All families	260	350	300	Expert opinion	Laurent Juillerat	100	435
Orthoptera, Acrididae	100		150	Expert opinion	Didier Morin	95	596
Orthoptera, Eumasticidae	7		11	Expert opinion	Didier Morin	0	13
Orthoptera, Gryllacrididae	10		15	Expert opinion	Didier Morin	0	2
Orthoptera, Gryllidae	70		105	Expert opinion	Didier Morin	19	89
Orthoptera, Gryllotalpidae	4		6	Expert opinion	Didier Morin	3	7
Orthoptera, Romaleidae	45		68	Expert opinion	Didier Morin	0	11
Orthoptera, Tetrigidae	18		27	Expert opinion	Didier Morin	10	27
Orthoptera, Tettigoniidae	180		365	Expert opinion	Didier Morin	76	265
Phasmatodea: Phasmatidae, Diapheromeridae and Prisopodidae	60	80	70	Statistical estimator	Oskar Conle	3	33
Repartition between Scarabaeidae subfamilies have been interpreted using: Jameson, M. L. 2002c. Chapter 29, Geotrupidae Latreille 1801, pp. 23-27. In, Arnett, R. H., M. Thomas, P. E. Skelley, and J. H. Frank (eds.), American Beetles, Volume 2. CRC Press, Boca Raton, Florida. 861 pp. Ratcliffe, B. C., M. L. Jameson, and A. B. T. Smith. 2002. Chapter 34. Scarabaeidae Latreille 1802, pp. 39-81 (in p…
